# Supplementary material for: Prospective analysis of in vivo landmark point-based MRI geometric distortion in head and neck cancer patients scanned in immobilized radiation treatment position: Results of a prospective quality assurance protocol
Source: PubMed Central journal article supplement — Clin Transl Radiat Oncol. 2017 Oct 10;7:13–9. doi: 10.1016/j.ctro.2017.09.003 (PMC5862642; doi:10.1016/j.ctro.2017.09.003), 2017-10-10
Supplement: mmc1.pdf [file mmc1.pdf]

Supplementary Figure 1

# Inter-observer variability

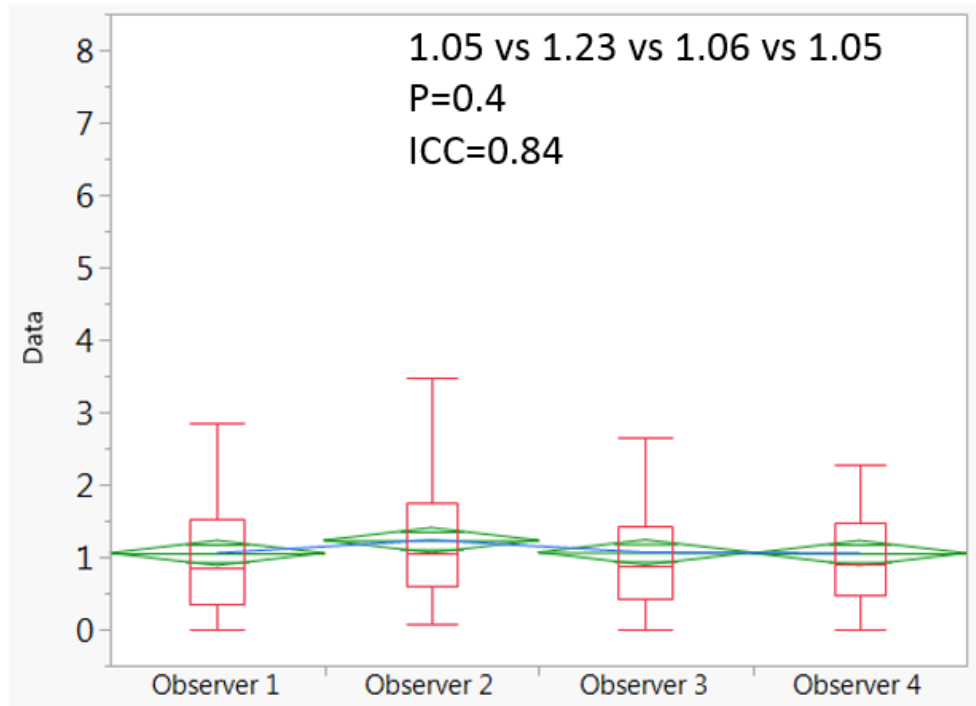

Supplementary figure 1. Box plots depicting the inter-observer variability for 100 landmark measurements between the four observers.
